# Supplementary material
Source: PubMed Central journal article supplement (PMC1885603)
Supplement: pnas_0610038104_5.pdf [file pnas_0610038104_5.pdf]

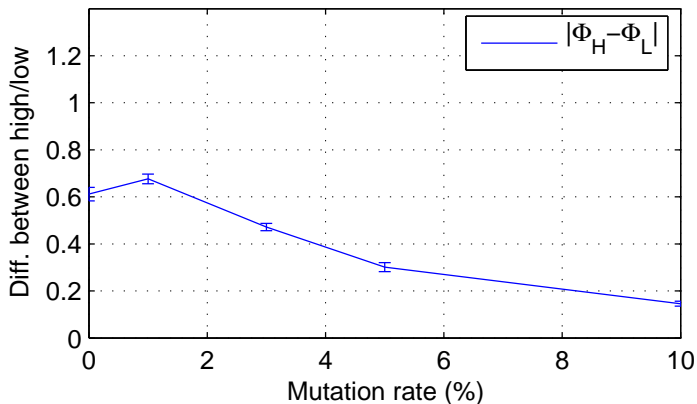

(a)  $T_{prop} = 5000$  for all runs,  $P_{mut} \in \{0, 0.01, 0.03, 0.05, 0.1\}$  for  $\{43, 57, 87, 42, 73\}$  runs with each value respectively.

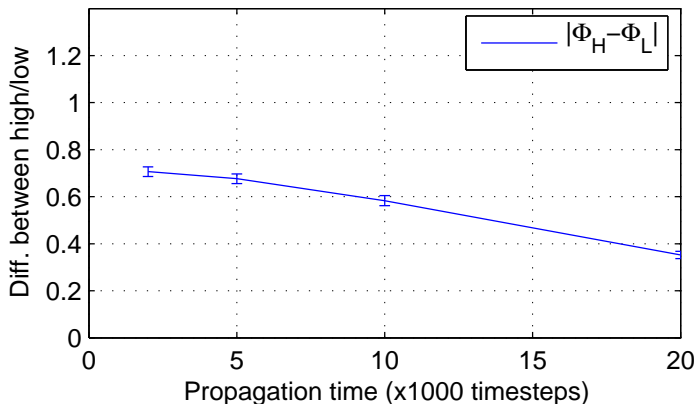

(b)  $P_{mut} = 0.01$  for all runs,  $T_{prop} \in \{2000, 5000, 10000, 20000\}$  for  $\{46, 57, 60, 75\}$  runs with each value respectively.
