# Supplementary material
Source: PubMed Central journal article supplement (PMC1885603)
Supplement: pnas_0610038104_8.pdf [file pnas_0610038104_8.pdf]

Table 2: Parameter values used in the simulation, deviations from these values are reported in the text.

| Parameter   | Value  | Description                                                        |
|-------------|--------|--------------------------------------------------------------------|
| $N$         | 3      | Number of nutrients                                                |
| $A$         | 3      | Number of abiotic factors                                          |
| $T_R$       | 120    | Reproduction threshold (biomass units)                             |
| $T_D$       | 50     | Starvation threshold (biomass units)                               |
| $P_{mut}$   | Varied | Probability of mutation at each genotype locus during reproduction |
| $P_D$       | 0.002  | Probability of death by natural causes at each timestep            |
| $\gamma$    | 1      | Maintenance cost (biomass units/timestep)                          |
| $\theta$    | 0.6    | Nutrient conversion efficiency                                     |
| $C^{max}$   | 10     | Maximum nutrient consumption rate (units/timestep)                 |
| $\tau$      | 1      | Level of influence of abiotic environment on metabolism            |
| $I_N^{min}$ | 0      | Minimum rate of nutrient influx (units/timestep)                   |
| $I_N^{max}$ | 300    | Maximum rate of nutrient influx (units/timestep)                   |
| $O_N^{min}$ | 0.01   | Minimum rate of nutrient outflux (fraction/timestep)               |
| $O_N^{max}$ | 0.25   | Maximum rate of nutrient outflux (fraction/timestep)               |
| $I_A^{min}$ | 0      | Minimum rate of abiotic factor influx (units/timestep)             |
| $I_A^{max}$ | 20     | Maximum rate of abiotic factor influx (units/timestep)             |
| $O_A^{min}$ | 0.01   | Minimum rate of abiotic factor outflux (fraction/timestep)         |
| $O_A^{max}$ | 0.25   | Maximum rate of abiotic factor outflux (fraction/timestep)         |
| $K_f$       | 20     | Number of flask ecosystems in each batch                           |
| $K_m$       | 100    | Number of individuals in flask inoculum                            |
| $T_{prep}$  | 500    | Flask equilibration time prior to seeding (timesteps)              |
| $T_{prop}$  | Varied | Propagation time for flask ecosystems                              |
