# Supplementary material
Source: PubMed Central journal article supplement (PMC1885603)
Supplement: pnas_0610038104_9.pdf [file pnas_0610038104_9.pdf]

Table 3: Mean performance ( $\Phi$ ) scores from tests of artificially selected ecosystems with perturbed environmental fluxes.

| Sampling  | $T_{prop}$ | $P_{mut}$ | Runs | Control | Low      |           | High     |           |
|-----------|------------|-----------|------|---------|----------|-----------|----------|-----------|
|           |            |           |      |         | Baseline | Perturbed | Baseline | Perturbed |
| Propagule | 2000       | 0.01      | 46   | 0.67    | 0.19     | 0.43      | 0.94     | 0.89      |
|           | 5000       | 0.01      | 57   | 0.66    | 0.16     | 0.39      | 0.93     | 0.88      |
|           | 10000      | 0.01      | 60   | 0.62    | 0.19     | 0.42      | 0.94     | 0.89      |
|           | 20000      | 0.01      | 75   | 0.71    | 0.29     | 0.43      | 0.89     | 0.90      |
|           | 5000       | 0         | 43   | 0.56    | 0.28     | 0.41      | 0.91     | 0.79      |
|           | 5000       | 0.01      | 57   | 0.66    | 0.16     | 0.39      | 0.93     | 0.88      |
|           | 5000       | 0.03      | 87   | 0.62    | 0.25     | 0.45      | 0.92     | 0.87      |
|           | 5000       | 0.05      | 42   | 0.56    | 0.32     | 0.45      | 0.86     | 0.86      |
|           | 5000       | 0.1       | 73   | 0.57    | 0.42     | 0.49      | 0.84     | 0.80      |
|           | All        | All       | 483  | 0.63    | 0.27     | 0.44      | 0.90     | 0.86      |
|           | Migrant    | 5000      | 0.01 | 49      | 0.73     | 0.19      | 0.36     | 0.96      |

Data shown for control line communities, baseline performance of selected communities, and flux-perturbed performance of selected communities. Results are given for propagule sampling (with varied  $T_{prop}$  and  $P_{mut}$ ) and for migrant pool sampling (with default settings), for both high and low selected lines. Perturbing the environmental fluxes has a significant effect on community performance, increasing  $\Phi$  for low-selected communities and decreasing  $\Phi$  for high-selected communities.
