# Supplementary material
Source: PubMed Central journal article supplement (PMC1885603)
Supplement: pnas_0610038104_11.pdf [file pnas_0610038104_11.pdf]

Table 5: Proportional subsets of artificially selected ecosystems representing intersections between the sets for O1, O2, O3 and O4.

| Sampling  | Line | $T_{prop}$ | $P_{mut}$ | Runs | (1)    | (2)    | (3)    | (4)    | (5)    | (6)    | (7)    | (8)    | (9)    | (10)   |
|-----------|------|------------|-----------|------|--------|--------|--------|--------|--------|--------|--------|--------|--------|--------|
| Propagule | L    | 2000       | 0.01      | 46   | 0.1957 | 0.0217 | 0.0217 | 0.0217 | 0.0217 | 0.0217 | 0      | 0.0217 | 0.0870 | 0.5870 |
|           | L    | 5000       | 0.01      | 57   | 0.2456 | 0      | 0.0351 | 0.0175 | 0      | 0      | 0.0702 | 0      | 0.0351 | 0.5965 |
|           | L    | 10000      | 0.01      | 60   | 0.1667 | 0.0667 | 0.0333 | 0.0833 | 0      | 0.0500 | 0.2167 | 0      | 0.0333 | 0.3500 |
|           | L    | 20000      | 0.01      | 75   | 0.2667 | 0.0133 | 0.0400 | 0.0400 | 0      | 0.0667 | 0.0267 | 0      | 0      | 0.5467 |
|           | L    | 5000       | 0         | 43   | 0.0698 | 0      | 0      | 0      | 0      | 0.0930 | 0.0465 | 0.0233 | 0.1395 | 0.6279 |
|           | L    | 5000       | 0.01      | 57   | 0.2456 | 0      | 0.0351 | 0.0175 | 0      | 0      | 0.0702 | 0      | 0.0351 | 0.5965 |
|           | L    | 5000       | 0.03      | 87   | 0.1954 | 0.0575 | 0.1264 | 0.1264 | 0      | 0.0345 | 0.1034 | 0      | 0.1264 | 0.2299 |
|           | L    | 5000       | 0.05      | 42   | 0.2381 | 0.1429 | 0.0238 | 0.2857 | 0      | 0.0714 | 0.0476 | 0      | 0.0238 | 0.1667 |
|           | L    | 5000       | 0.1       | 73   | 0.0411 | 0.0959 | 0.2192 | 0.5068 | 0.0274 | 0.0137 | 0.0274 | 0      | 0      | 0.0685 |
|           | H    | 2000       | 0.01      | 46   | 0.2826 | 0      | 0.4130 | 0.2174 | 0      | 0      | 0.0217 | 0      | 0.0217 | 0.0435 |
|           | H    | 5000       | 0.01      | 57   | 0.3158 | 0      | 0.3684 | 0.1930 | 0      | 0      | 0.0877 | 0      | 0      | 0.0351 |
|           | H    | 10000      | 0.01      | 60   | 0.2667 | 0.0167 | 0.2833 | 0.1333 | 0      | 0.0167 | 0.1167 | 0      | 0.1500 | 0.0167 |
|           | H    | 20000      | 0.01      | 75   | 0.2000 | 0      | 0.4267 | 0.3733 | 0      | 0      | 0      | 0      | 0      | 0      |
|           | H    | 5000       | 0         | 43   | 0      | 0      | 0      | 0.0465 | 0      | 0.0233 | 0.1860 | 0.0930 | 0.3488 | 0.3023 |
|           | H    | 5000       | 0.01      | 57   | 0.3158 | 0      | 0.3684 | 0.1930 | 0      | 0      | 0.0877 | 0      | 0      | 0.0351 |
|           | H    | 5000       | 0.03      | 87   | 0.3448 | 0.0115 | 0.3908 | 0.1609 | 0      | 0.0345 | 0.0575 | 0      | 0      | 0      |
|           | H    | 5000       | 0.05      | 42   | 0.0952 | 0      | 0.4048 | 0.4762 | 0      | 0      | 0.0238 | 0      | 0      | 0      |
|           | H    | 5000       | 0.1       | 73   | 0.0411 | 0.0137 | 0.4521 | 0.4795 | 0      | 0      | 0.0137 | 0      | 0      | 0      |
|           | L    | All        | All       | 483  | 0.1781 | 0.0497 | 0.0745 | 0.1449 | 0.0062 | 0.0414 | 0.0704 | 0.0041 | 0.0538 | 0.3768 |
|           | H    | All        | All       | 483  | 0.2050 | 0.0062 | 0.3582 | 0.2650 | 0      | 0.0104 | 0.0580 | 0.0083 | 0.0518 | 0.0373 |
| Migrant   | L    | 5000       | 0.1       | 49   | 0.5510 | 0.0204 | 0.0408 | 0.0204 | 0.0408 | 0.0204 | 0.0408 | 0      | 0.0204 | 0.2449 |
|           | H    | 5000       | 0.01      | 49   | 0.3469 | 0      | 0.5306 | 0.1020 | 0      | 0      | 0.0204 | 0      | 0      | 0      |

1

| Index | Subset                             | Index | Subset                               |
|-------|------------------------------------|-------|--------------------------------------|
| (1)   | $O1 \cap O2^c \cap O3^c \cap O4^c$ | (6)   | $O1^c \cap O2 \cap O3^c \cap O4^c$   |
| (2)   | $O1 \cap O2 \cap O3^c \cap O4^c$   | (7)   | $O1 \cap O2^c \cap O3^c \cap O4$     |
| (3)   | $O1 \cap O2 \cap O3 \cap O4^c$     | (8)   | $O1^c \cap O2 \cap O3^c \cap O4$     |
| (4)   | $O1 \cap O2 \cap O3 \cap O4$       | (9)   | $O1^c \cap O2^c \cap O3^c \cap O4$   |
| (5)   | $O1 \cap O2 \cap O3^c \cap O4$     | (10)  | $O1^c \cap O2^c \cap O3^c \cap O4^c$ |

Data shown for high and low lines, for both propagule and migrant pool sampling methods. Variation shown along axes for  $P_{mut}$  and  $T_{prop}$ . Target vector  $(\bar{a}_1, \bar{a}_2, \bar{a}_3) = (0.2, 0.3, 0.5)$ .
