# Supplementary material
Source: PubMed Central journal article supplement (PMC1885603)

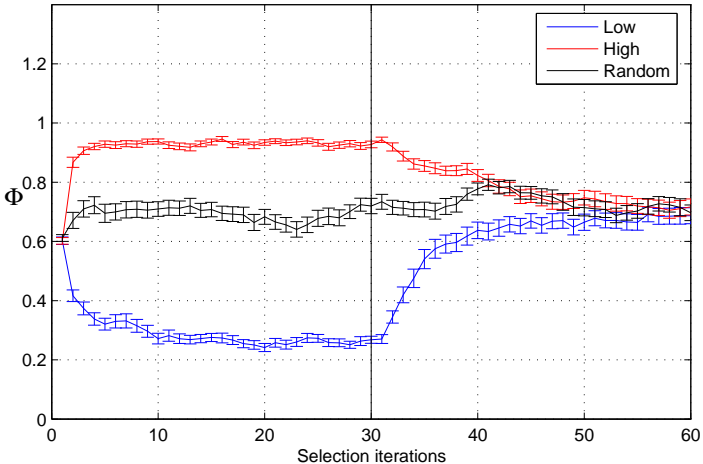

Supplement: pnas_0610038104_1.pdf [file pnas_0610038104_1.pdf]

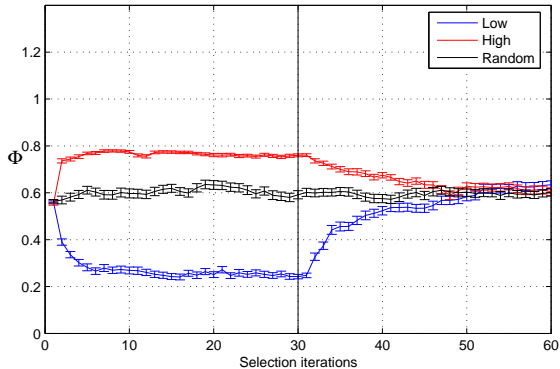

(a) Target  $(\bar{a}_1, \bar{a}_2, \bar{a}_3) = (0.333, 0.333, 0.333)$  / 90 runs

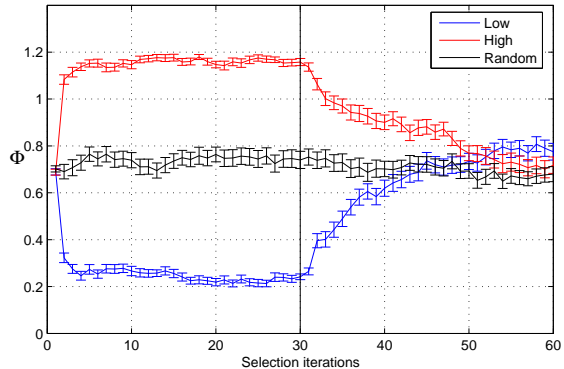

(b) Target  $(\bar{a}_1, \bar{a}_2, \bar{a}_3) = (0.3, 0.7, 0.0)$  / 79 runs

Supplement: pnas_0610038104_2.pdf [file pnas_0610038104_2.pdf]

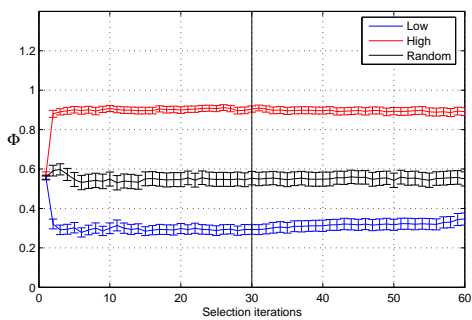

(a)  $P_{mut} = 0$  / 43 runs

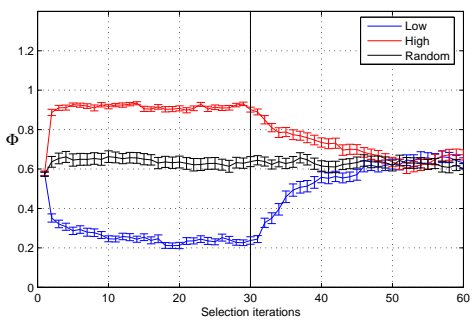

(b)  $P_{mut} = 0.01$  / 57 runs

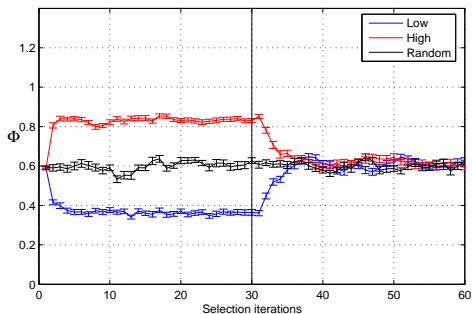

(c)  $P_{mut} = 0.03$  / 87 runs

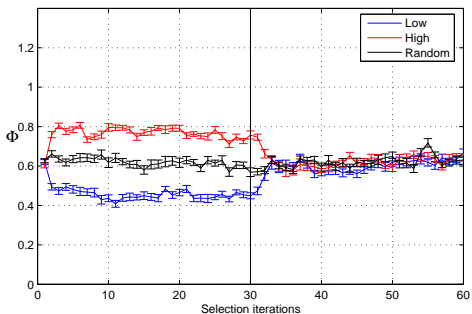

(d)  $P_{mut} = 0.05$  / 42 runs

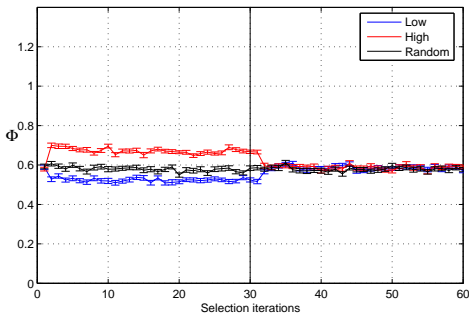

(e)  $P_{mut} = 0.1$  / 73 runs

Supplement: pnas_0610038104_3.pdf [file pnas_0610038104_3.pdf]

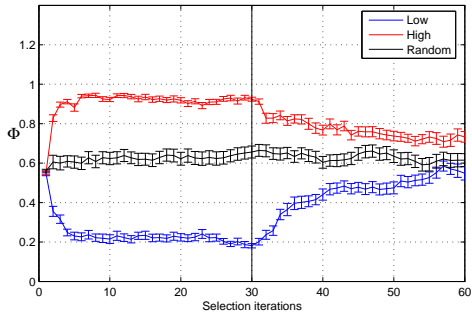

(a)  $T_{prop} = 2000$  / 46 runs

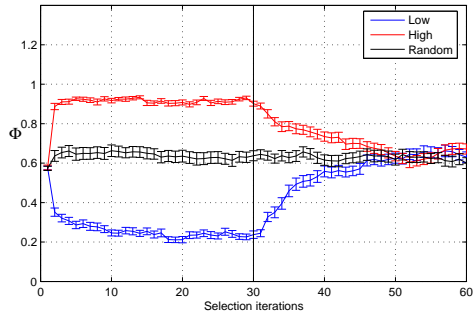

(b)  $T_{prop} = 5000$  / 57 runs

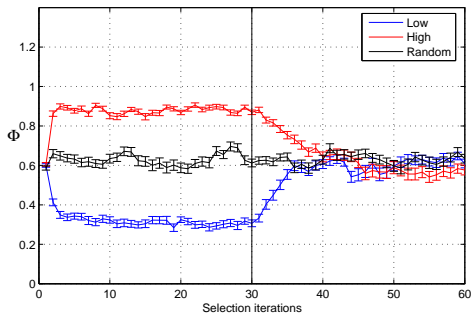

(c)  $T_{prop} = 10000$  / 60 runs

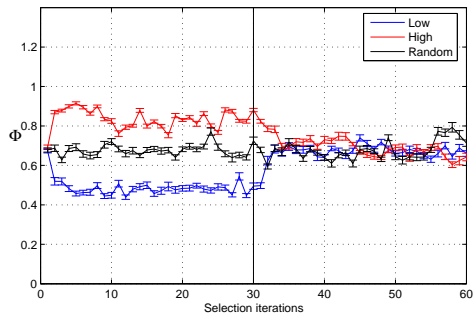

(d)  $T_{prop} = 20000$  / 75 runs

Supplement: pnas_0610038104_4.pdf [file pnas_0610038104_4.pdf]
